# Supplementary figures and images for: Homogenate Extraction of Polysaccharides from Pine Nut Meal: Optimization and Comparison with Other Extraction Methods by Characterizing Their Extracts
Source: Hindawi journal article supplement (doi:10.1155/2020/7918703), 2020-06-03

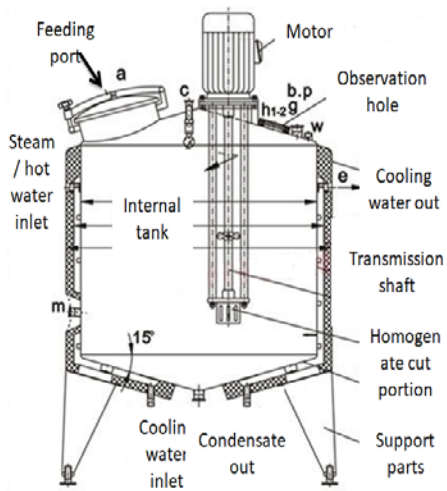

**Supplementary Figure 1.** The draft of the device used for homogenate extraction.

Supplement: f1 [file 7918703.f1.pdf]
